# Supplementary material for: Novel Polyoxyethylene-Containing Glycolipids Are Synthesized inCorynebacterium matruchotiiandMycobacterium smegmatisCultured in the Presence of Tween 80
Source: Hindawi journal article supplement (doi:10.1155/2011/676535), 2010-07-20
Supplement: f1 [file 676535.f1.pdf]

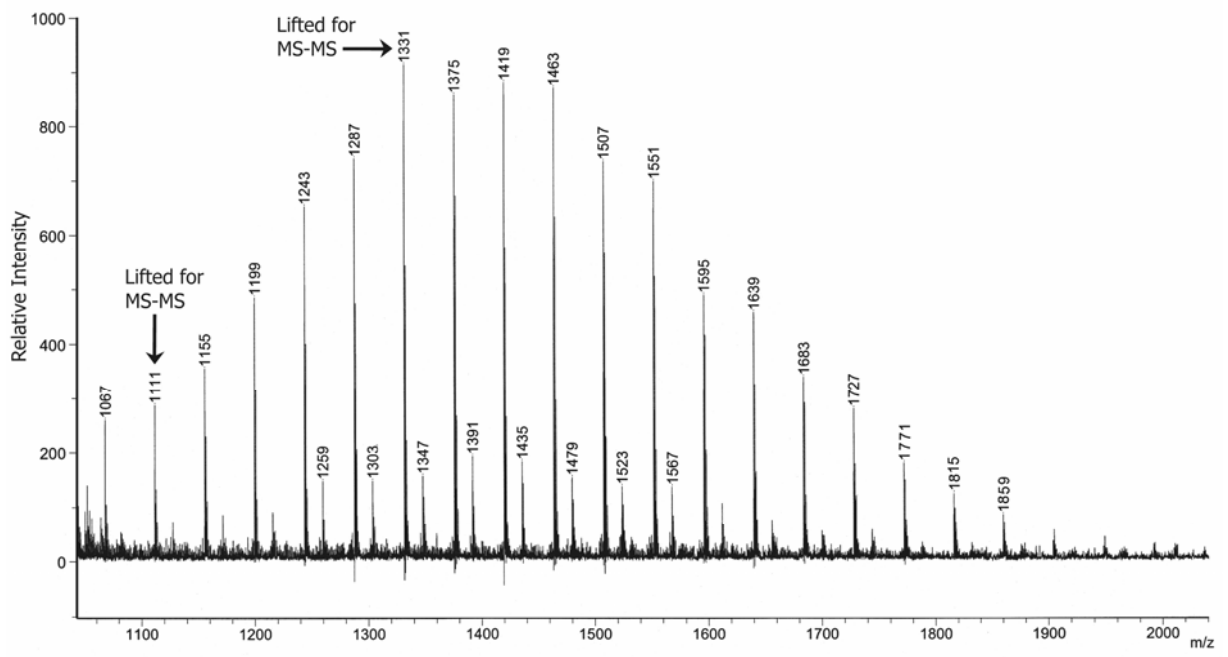

Figure S1
